# Supplementary material for: InDel DNA Markers Potentially Unique to Kaluga Sturgeon Huso dauricus Based on Whole-Genome Resequencing Data
Source: MDPI journal article supplement (doi:10.3390/d15050689), 2023-05-19
Supplement: s1 [file s1]

Archive with 1 entries (1 files):
- diversity-2166995-supplementary.pdf
