# Supplementary material for: InDel DNA Markers Potentially Unique to Kaluga Sturgeon Huso dauricus Based on Whole-Genome Resequencing Data
Source: MDPI journal article supplement (doi:10.3390/d15050689), 2023-05-19
Supplement: s1 [file s1 › diversity-2166995-supplementary.pdf]

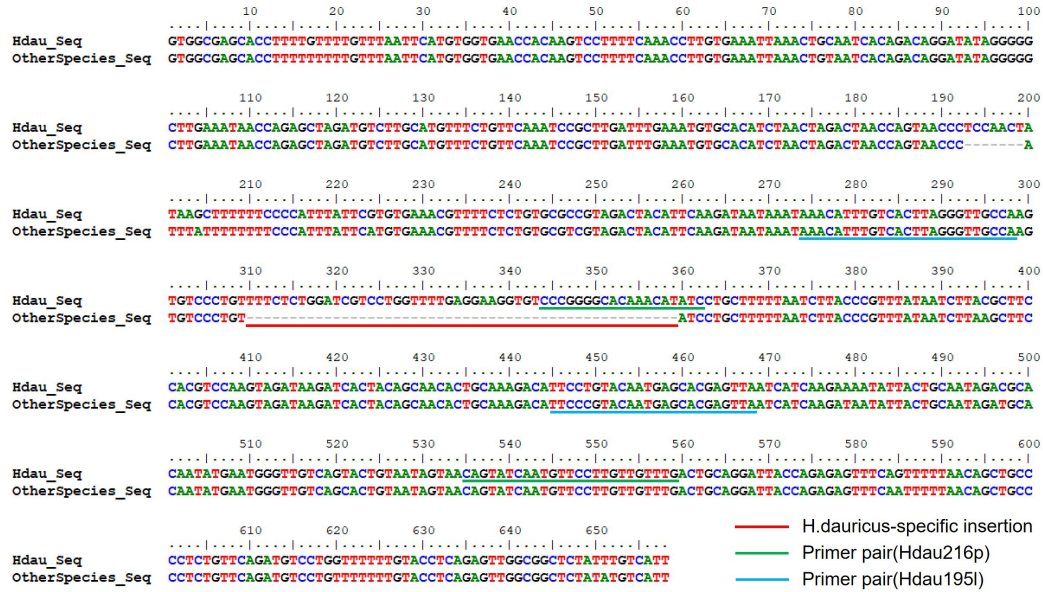

**Figure S1.** Alignment of consensus sequence of *H. dauricus* and other sturgeon around the insertion (including the upstream and downstream sequences of 300 bp). The red underline marks the specific insertion of *H. dauricus*. The green and blue underline mark the dominant and co-dominant primers(Hdau216p/Hdau195I) respectively.
